# Supplementary material
Source: PubMed Central journal article supplement (PMC4165609)
Supplement: NIHMS570581-supplement-Supplement_Figure_3.pdf [file NIHMS570581-supplement-Supplement_Figure_3.pdf]

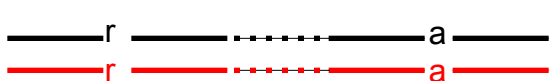

a  
a  
low expression, balanced

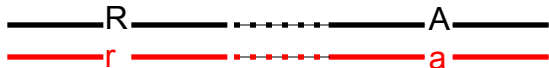

A  
A  
A  
a  
high/low expression, imbalanced

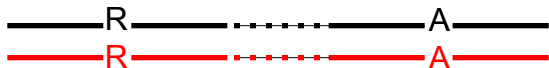

A  
A  
A  
A  
A  
A  
high expression, balanced

R/r: Risk-associated SNP  
A/a: exonic SNP
