# Supplementary material
Source: PubMed Central journal article supplement (PMC4165609)

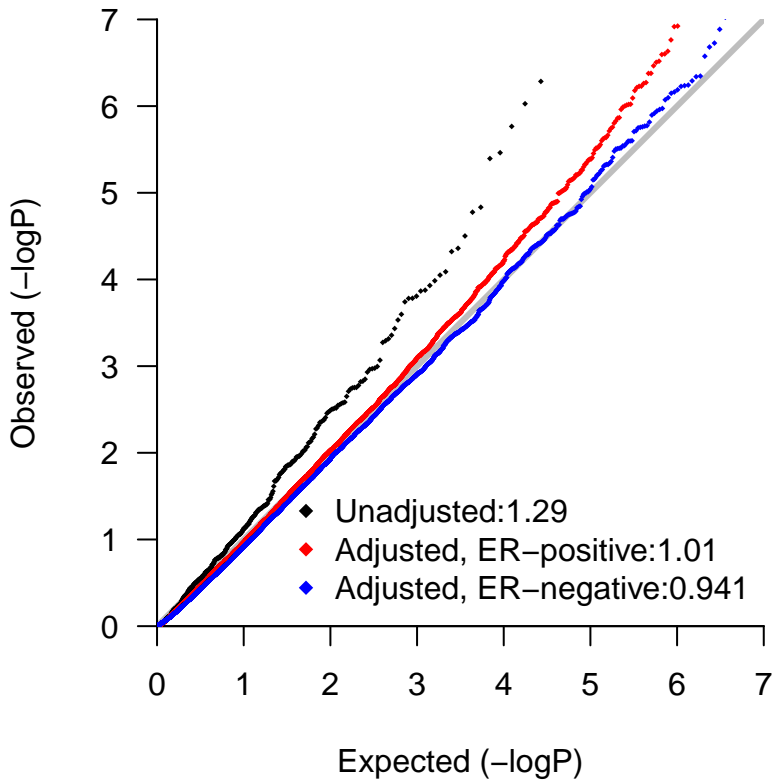

Supplement: NIHMS570581-supplement-Supplement_Figure_1.pdf [file NIHMS570581-supplement-Supplement_Figure_1.pdf]

A

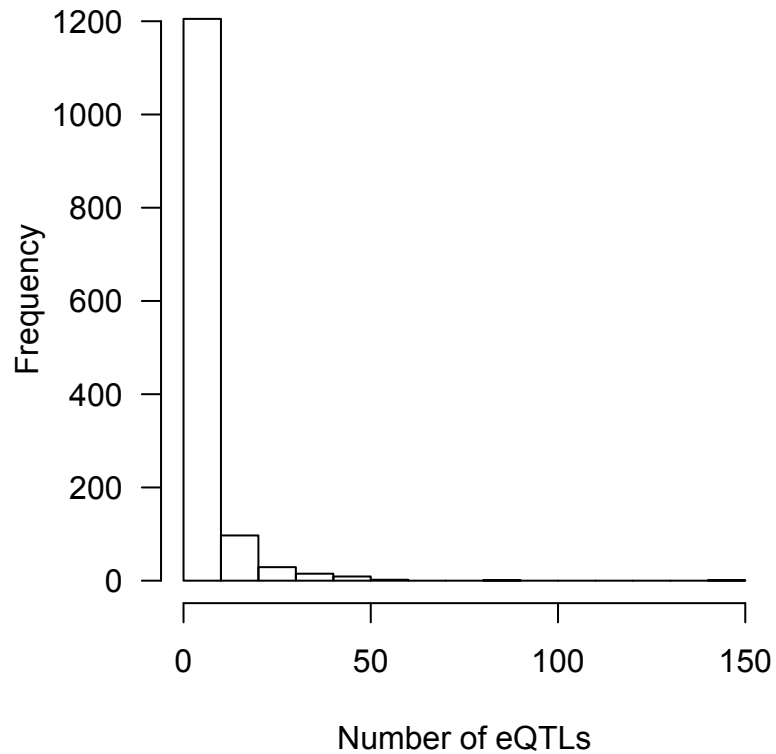

B

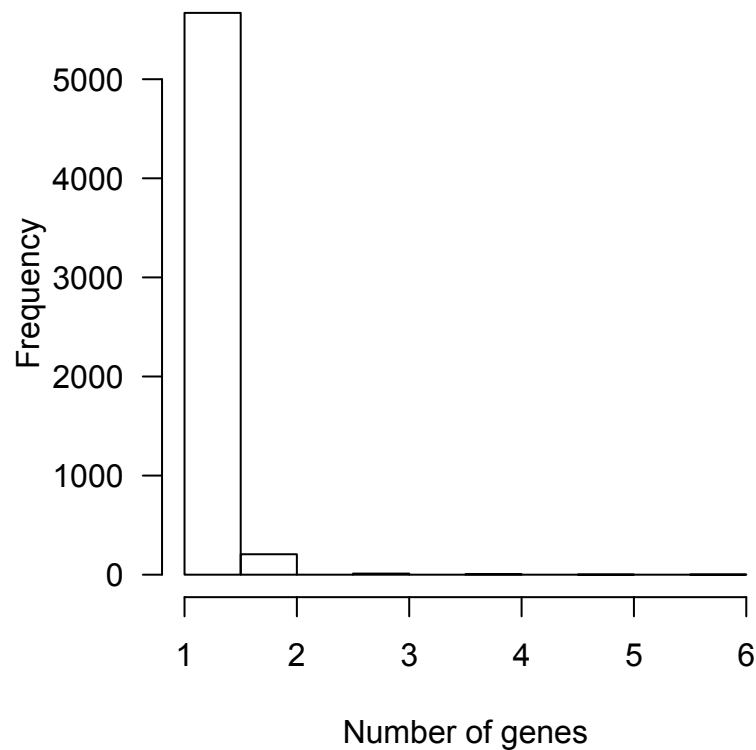

C

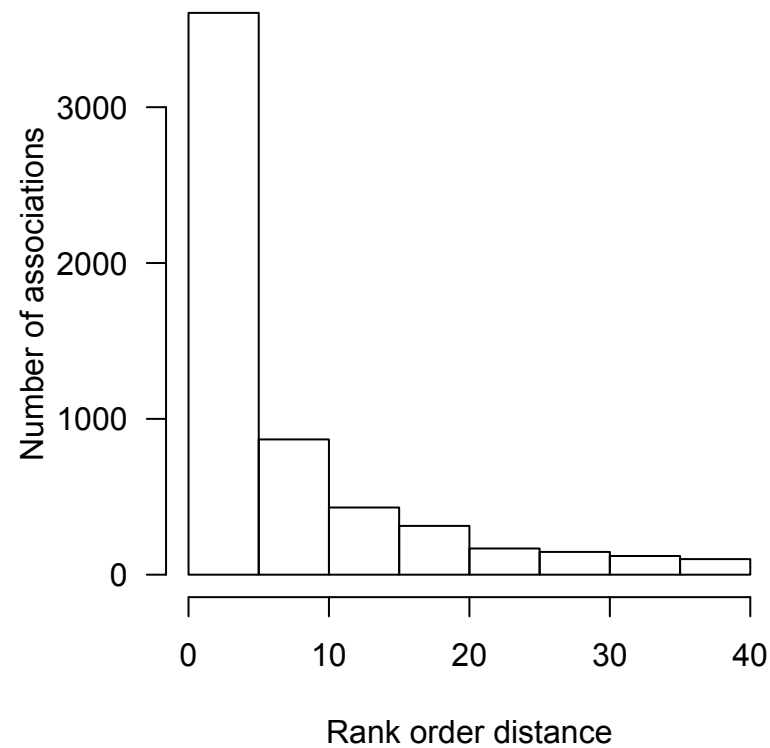

Supplement: NIHMS570581-supplement-Supplement_Figure_2.pdf [file NIHMS570581-supplement-Supplement_Figure_2.pdf]

A

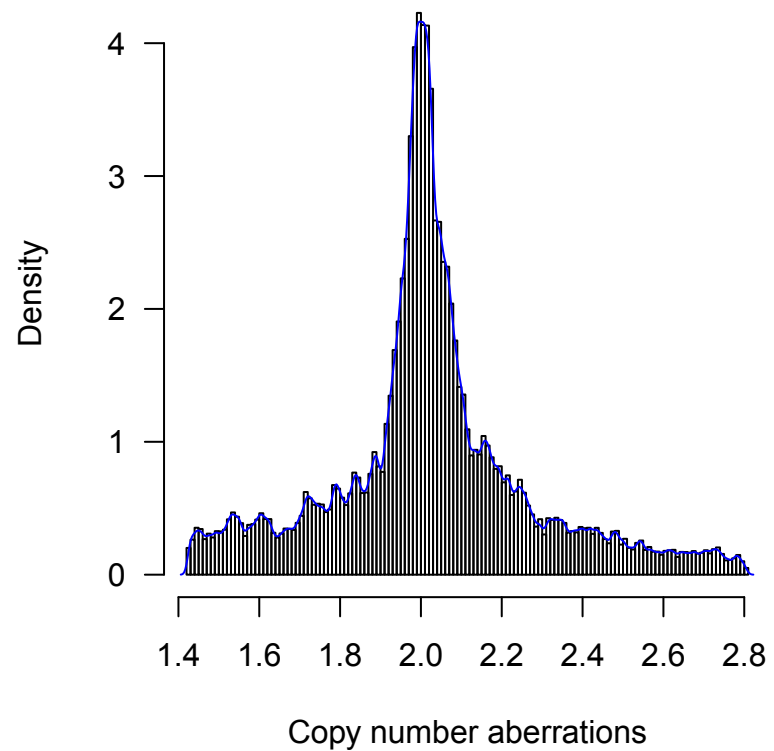

B

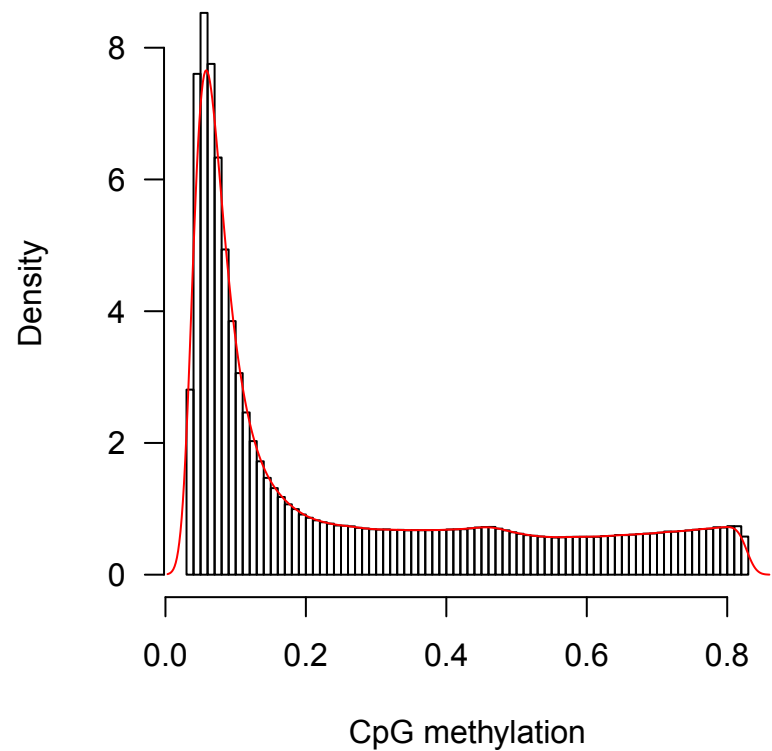

C

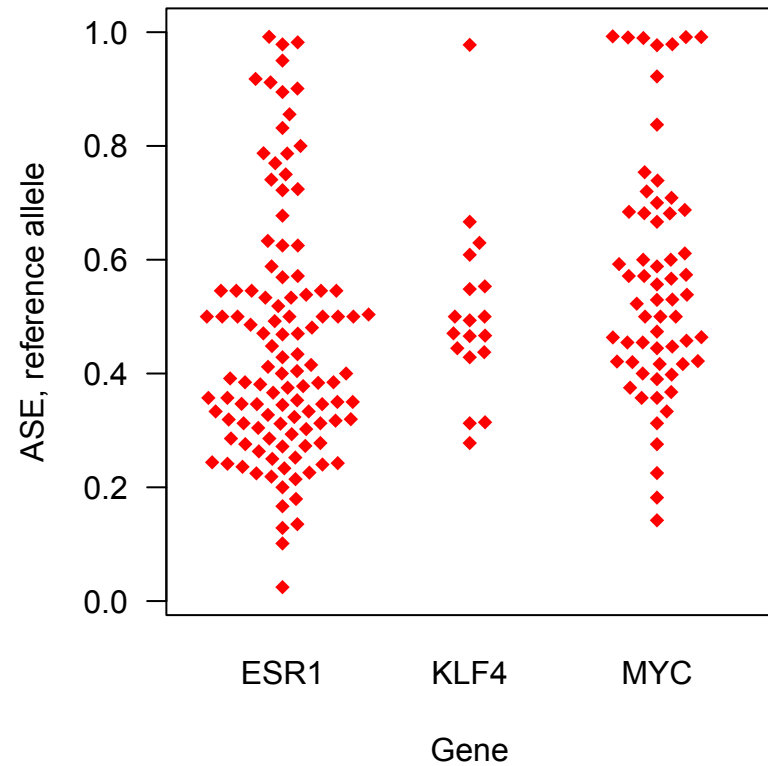

Supplement: NIHMS570581-supplement-Supplement_Figure_4.pdf [file NIHMS570581-supplement-Supplement_Figure_4.pdf]
